# Supplementary material
Source: ML conference proceedings conference paper supplement (https://proceedings.neurips.cc/paper_files/paper/2020/hash/83d3d4b6c9579515e1679aca8cbc8033-Abstract.html)
Supplement: Supplementary file [file 83d3d4b6c9579515e1679aca8cbc8033-Supplemental.zip]

## **JAX MD: Supplementary Material**

We include anonymized code for JAX MD as well as the various iPython notebooks in the supplementary material. We also have an anonymized version of the code uploaded on github at [www.github.com/conference-submitter/jax-md](https://www.github.com/conference-submitter/jax-md). The paper includes links to iPython notebooks that will execute using Google Colaboratory with a free GPU.
